# Supplementary material for: The order of loading affects photocatalytic nitrogen fixation activity of the ternary composites of PdO/Au–TiO2
Source: Royal Society of Chemistry journal article supplement (doi:10.1039/d2nj06240b), 2023-01-01
Supplement: d2nj06240b1.pdf [file d2nj06240b1.pdf]

NJC

## Electronic Supplementary Information

### The order of loading affects photocatalytic nitrogen fixation activity of the ternary composites of PdO/Au-TiO<sub>2</sub>

Xuejing Wang, Sifan Liu, Ruixiao Ma, Wenwen Yang, Yanmei Chen, Juan Xu and Yanhui Zhang\*

College of Chemistry, Chemical Engineering and Environment, Fujian Province Key Laboratory of Morden Analytical Science and Separation Technology, Minnan Normal University, Zhangzhou, 363000, P.R. China

\*To whom correspondence should be addressed. E-mail Address: [zhangyh@mnnu.edu.cn](mailto:zhangyh@mnnu.edu.cn)

#### 1. The calculation formula and details of ICP-OES are as follows:

$$C_x(\text{mg/kg}) = \frac{C_0(\text{mg/L}) \times f \times V_0(\text{mL}) \times 10^{-3}}{m(\text{g}) \times 10^{-3}} = \frac{C_1(\text{mg/L}) \times V_0(\text{mL}) \times 10^{-3}}{m(\text{g}) \times 10^{-3}} \quad (1)$$

$$C_1(\text{mg/L}) = C_0(\text{mg/L}) \times f \quad (2)$$

$$W(\%) = \frac{C_x(\text{mg/kg})}{10^6} \times 100\% \quad (3)$$

Among them,  $m_0$ ,  $V_0$ ,  $C_0$ ,  $f$ ,  $C_1$ ,  $C_x$  and  $W$  are quality of sample, constant volume, test solution element concentration, dilution multiple, element concentration of digestion solution/original sample solution, sample element concentration and sample element content.

#### 2. The AQEs experiment was performed as follows:

25 mg of PdO/Au-TiO<sub>2</sub> was dispersed in 130 mL mixture of ultrapure water and ethylene glycol (V:V=9:1) and irradiated under a xenon lamp with bandpass filters ( $\lambda = 365, 400, 500, 550, 600$  nm, irradiation area 0.0044 m<sup>2</sup>), the calculation formula and details of AQEs are as follows:

$$N_{photo} = \frac{t(\text{s}) \times P(\text{W} \cdot \text{m}^{-2}) \times S(\text{m}^2) \times \lambda(\text{m})}{h(\text{J} \cdot \text{s}) \times c(\text{m} \cdot \text{s}^{-1})} \quad (4)$$

$$AQEs(\%) = \frac{3\text{NH}_4^+(\text{mol}) \times N_A(\text{mol}^{-1})}{N_{photo}} \times 100\% \quad (5)$$

Among them,  $t$ ,  $P$ ,  $S$ ,  $\lambda$ ,  $h$ ,  $c$  and  $N_A$  are reaction time, optical power density, irradiation area, the wavelength of incident light, Planck's constant, the speed of light and Avogadro's constant.

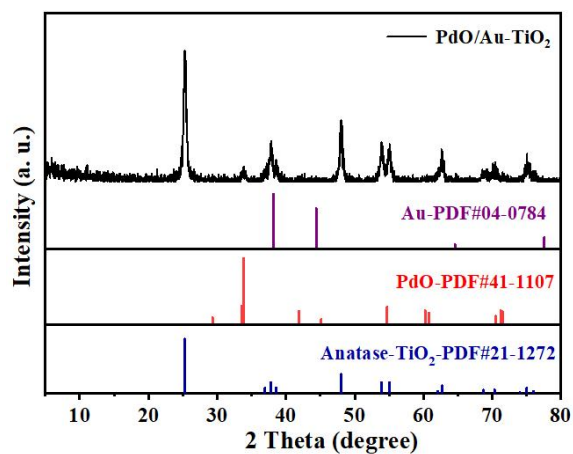

Fig. S1. The standard XRD cards of TiO<sub>2</sub>, Au and PdO.

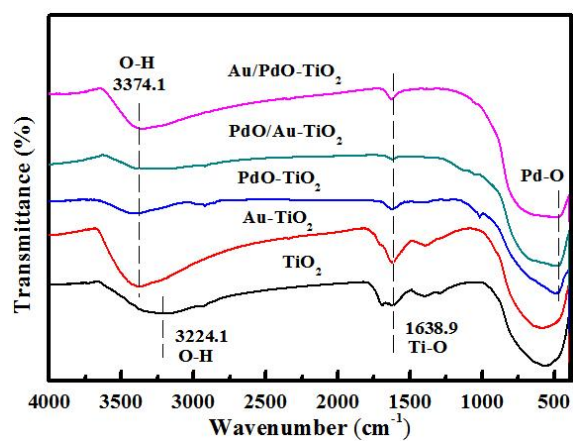

Fig. S2. FT-IR spectra of TiO<sub>2</sub>, Au-TiO<sub>2</sub>, PdO-TiO<sub>2</sub>, PdO/Au-TiO<sub>2</sub> and Au/PdO-TiO<sub>2</sub>.

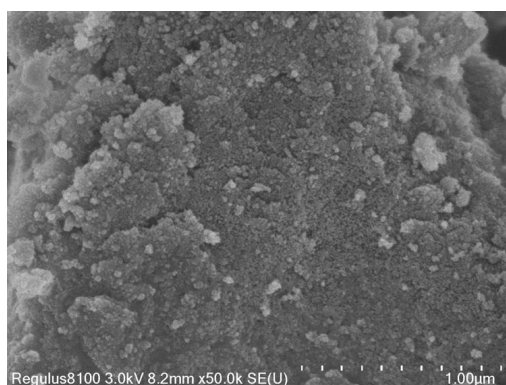

Fig. S3. SEM images of pure TiO<sub>2</sub>.

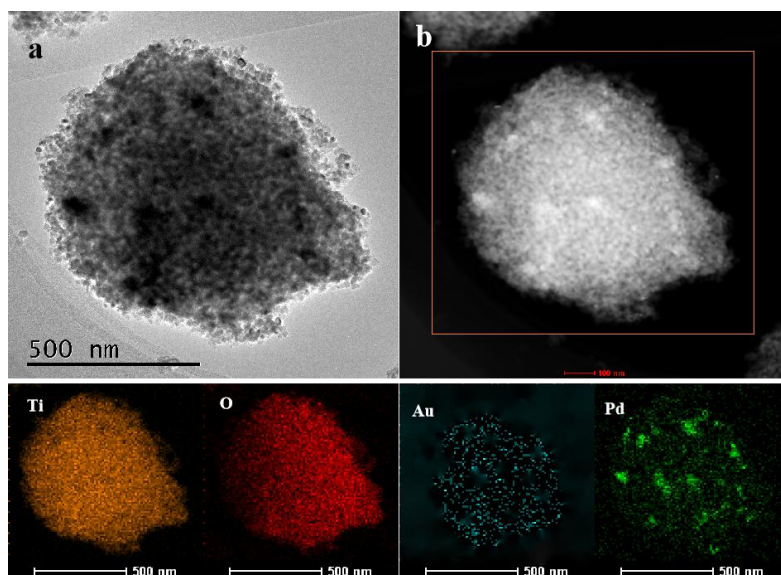

**Fig. S4.** TEM of Au/PdO-TiO<sub>2</sub> catalysts (a), elemental mapping images showing Ti, O, Au, and Pd elements in the PdO/Au-TiO<sub>2</sub> (b).

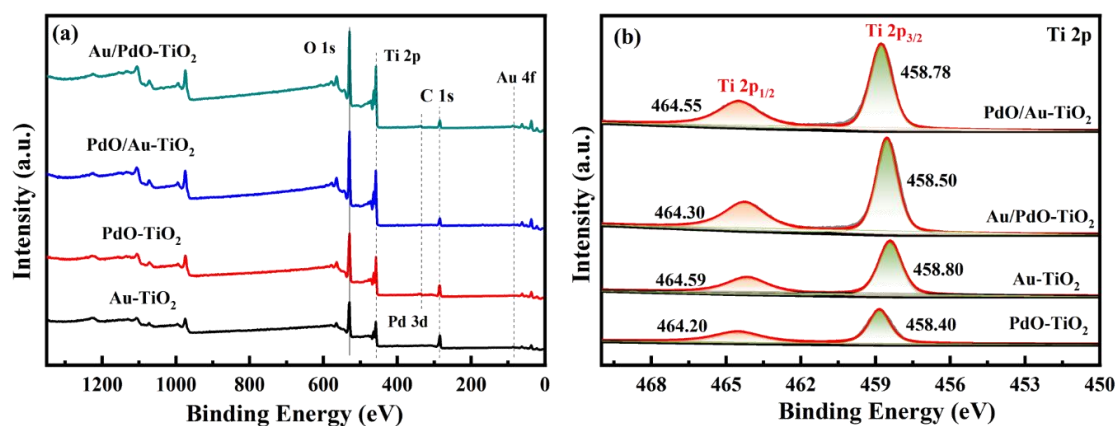

**Fig. S5.** The XPS Survey of Au-TiO<sub>2</sub>, PdO-TiO<sub>2</sub>, PdO/Au-TiO<sub>2</sub> and Au/PdO-TiO<sub>2</sub> (a), and the high-resolution XPS spectra of Ti 2p (b).

**Table S1.** The actual load content of PdO and Au in PdO/Au-TiO<sub>2</sub> was measured by ICP-OES.

| Sample                  | m (g)  | V <sub>0</sub> (mL) | Test elements | C <sub>0</sub> (mg/L) | f  | C <sub>1</sub> (mg/L) | C <sub>x</sub> (mg/kg) | W      |
|-------------------------|--------|---------------------|---------------|-----------------------|----|-----------------------|------------------------|--------|
| PdO/Au-TiO <sub>2</sub> | 0.0494 | 10                  | Au            | 6.29                  | 10 | 62.91                 | 12735.04               | 1.2735 |
|                         | 0.0494 | 10                  | Pd            | 4.56                  | 10 | 45.58                 | 9225.77                | 0.9226 |

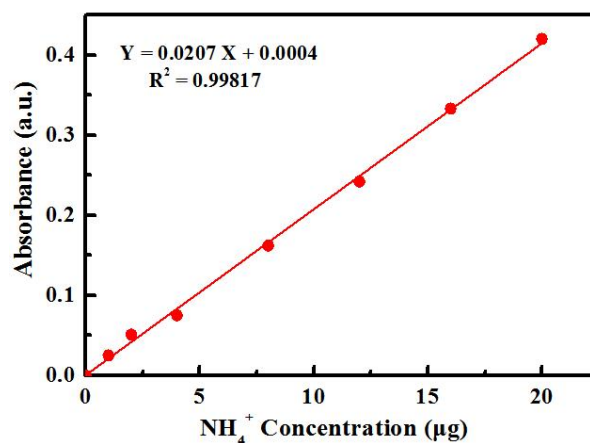

Fig. S6. Ammonia nitrogen standard curve.

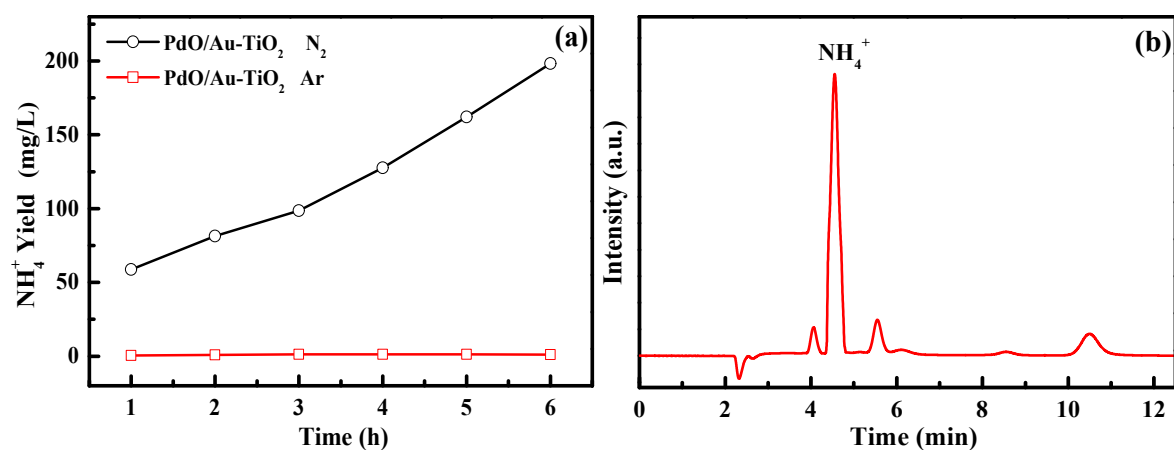

Fig. S7. The ammonia yield of PdO/Au-TiO<sub>2</sub> with N<sub>2</sub> and Ar atmosphere (a); the ion chromatographic peaks of NH<sub>4</sub><sup>+</sup> (b).

Table S2. The apparent quantum yields of the PdO/Au-TiO<sub>2</sub> composites.

| Wavelength (nm) | 365  | 400 | 500 | 550 | 600 |
|-----------------|------|-----|-----|-----|-----|
| AQEs (%)        | 20.6 | 3.2 | 0   | 0   | 0   |

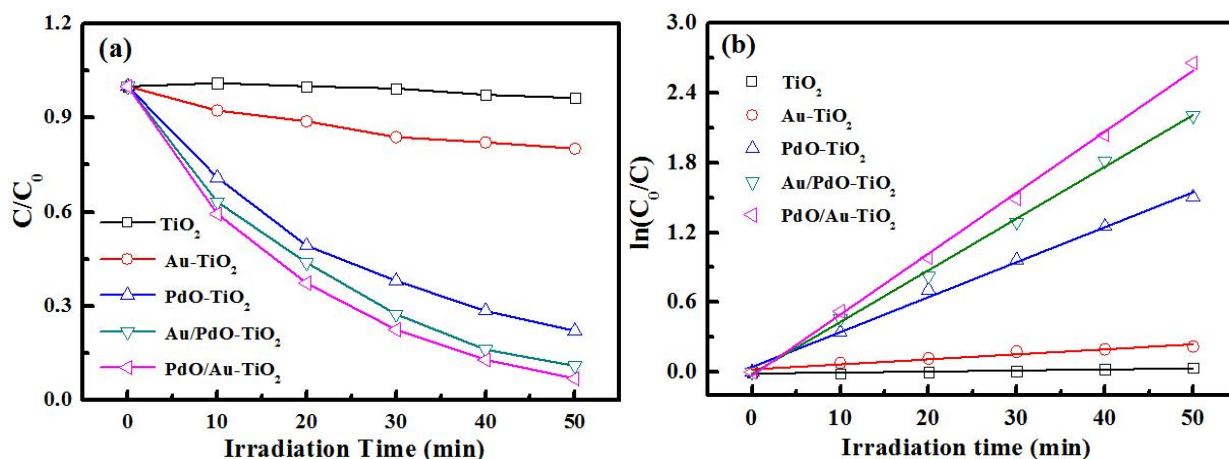

**Fig. S8.** Trends of ciprofloxacin (10 mg/L) photocatalytic degradation and first order kinetic constant fitting diagram of photocatalytic rate of  $\text{TiO}_2$ ,  $\text{Au-TiO}_2$ ,  $\text{PdO-TiO}_2$ ,  $\text{Au/PdO-TiO}_2$  and  $\text{PdO/Au-TiO}_2$ .

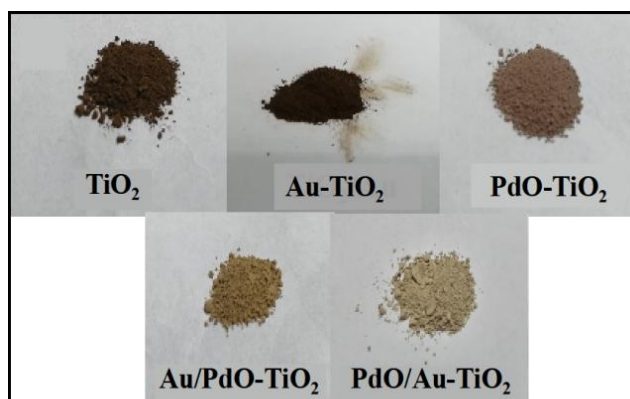

**Fig. S9.** The color difference map of  $\text{TiO}_2$ ,  $\text{Au-TiO}_2$ ,  $\text{PdO-TiO}_2$ ,  $\text{Au/PdO-TiO}_2$  and  $\text{PdO/Au-TiO}_2$ .

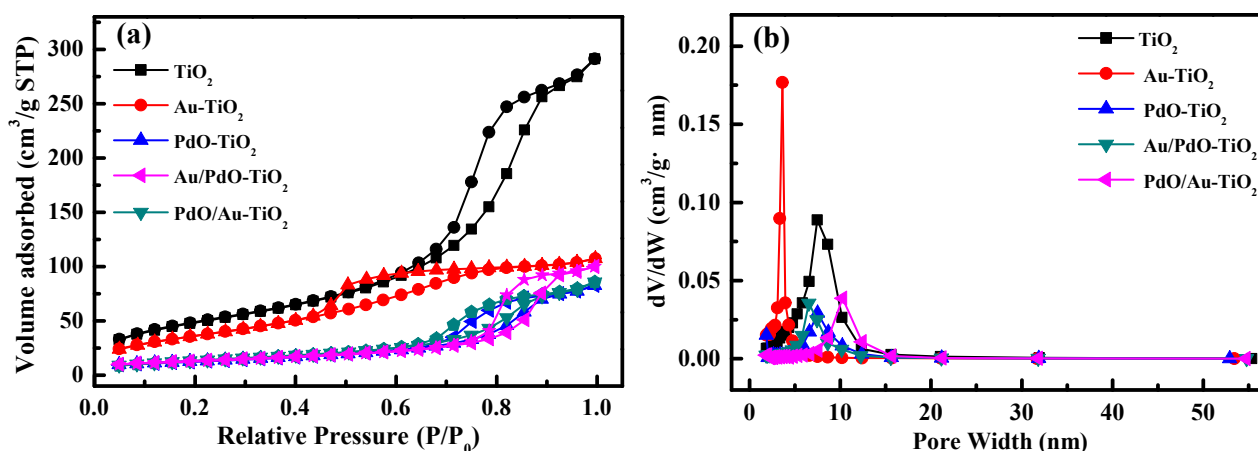

**Fig. S10.** The nitrogen adsorption and desorption curves (a) and pore size distribution (b) of the  $\text{TiO}_2$ ,  $\text{Au-TiO}_2$ ,  $\text{PdO-TiO}_2$ ,  $\text{PdO/Au-TiO}_2$  and  $\text{Au/PdO-TiO}_2$ .

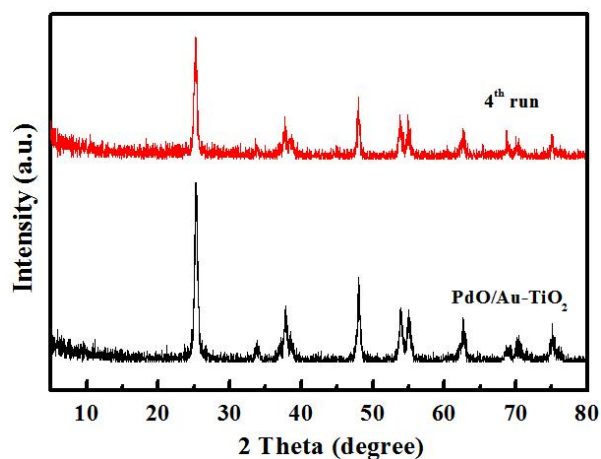

Fig. S11. XRD patterns of PdO/Au-TiO<sub>2</sub> after 4 cycles of experiments.

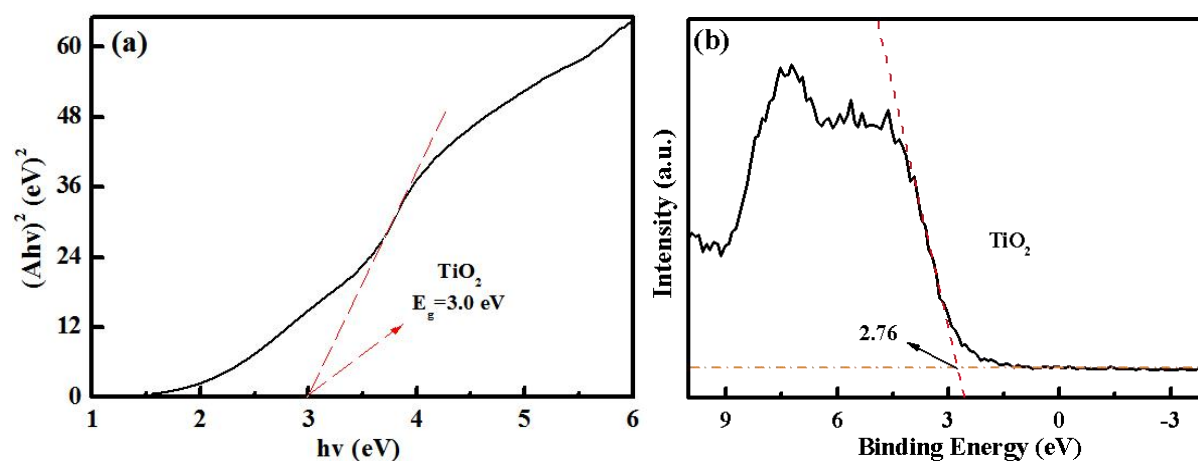

Fig. S12. Tauc curve of TiO<sub>2</sub> (a) and Valence band XPS spectra (b).

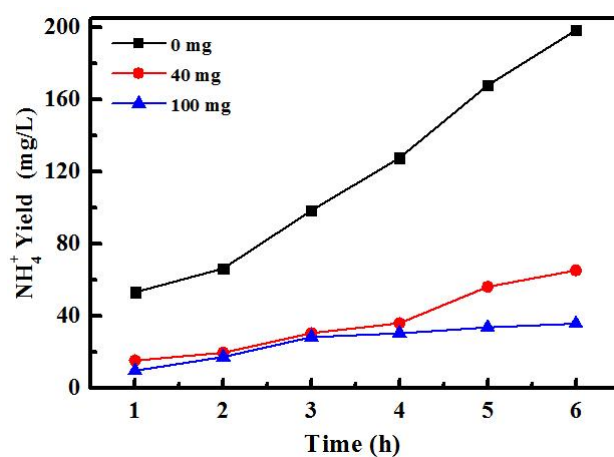

Fig. S13. The effects of electron sacrificial agent (AgNO<sub>3</sub>) on the photocatalytic nitrogen fixation activity of PdO/Au-TiO<sub>2</sub> composites.
